# Supplementary material for: PCE11-based polymer solar cells with high efficiency over 13% achieved by room-temperature processing
Source: Royal Society of Chemistry journal article supplement (doi:10.1039/d0ta02271c), 2020-01-01
Supplement: d0ta02271c1.pdf [file d0ta02271c1.pdf]

## Supporting Information

### PCE11-Based Polymer Solar Cells with High Efficiency over 13% Achieved by Room-Temperature Processing

Jianyun Zhang, Wenrui Liu, Ming Zhang, Shengjie Xu\*, Feng Liu, and Xiaozhang Zhu\*

#### Synthetic Procedures

The synthetic route for compound ZITI-N-R is similar with the synthesis of ZITI-N,<sup>50</sup> the alkylation reaction with methyl, octyl and ethylhexyl, respectively.

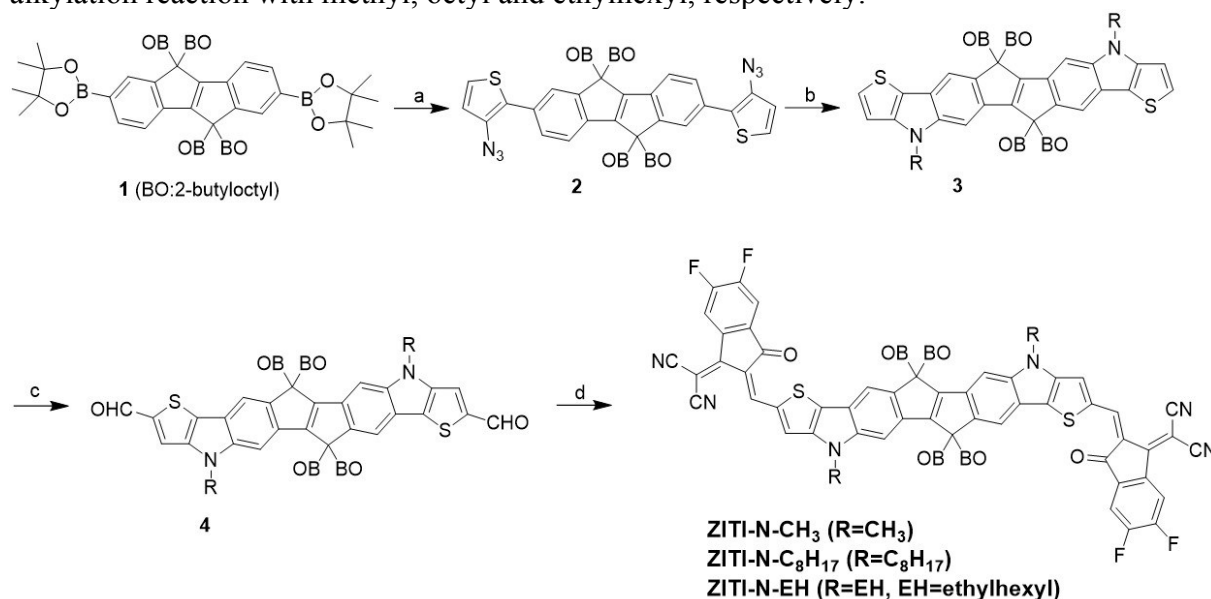

**Scheme S1.** Synthesis of ZITI-N-R NFAs. Reagents and conditions: a, (i) 2,3-Dibromothiophene, Pd(PPh<sub>3</sub>)<sub>4</sub>, THF; (ii) *n*-BuLi, Tos-N<sub>3</sub>, THF. b, (i) *o*-dichlorobenzene, 160 °C; (ii) NaH, CH<sub>3</sub>I, DMF. c, POCl<sub>3</sub>, DMF. d, INCN-2F, pyridine, CHCl<sub>3</sub>.

**Compound ZITI-N-C<sub>8</sub>H<sub>17</sub>.** <sup>1</sup>H NMR (300 MHz, CDCl<sub>3</sub>): δ 8.99 (s, 2H), 8.54 (m, 2H), 7.87 (s, 2H), 7.82 (s, 2H), 7.69 (t, <sup>3</sup>J = 7.5 Hz, 2H), 7.26 (s, 2H), 4.29 (m, 4H), 2.17 (m, 8H), 1.94 (m, 4H), 1.30-0.50 (m, 118H); HRMS (MALDI-TOF) calcd for C<sub>100</sub>H<sub>118</sub>F<sub>4</sub>N<sub>6</sub>O<sub>2</sub>S<sub>2</sub> [M]<sup>+</sup>: 1771.0879, found, 1771.0874.

**Compound ZITI-N-EH.** <sup>1</sup>H NMR (400 MHz, CDCl<sub>3</sub>): δ 8.97 (s, 2H), 8.54 (m, 2H), 7.89 (s, 2H), 7.82 (s, 2H), 7.69 (t, <sup>3</sup>J = 7.6 Hz, 2H), 7.30 (s, 2H), 4.18 (m, 4H), 2.13 (m, 10H), 1.20-0.50 (m, 120H); HRMS (MALDI-TOF) calcd for C<sub>100</sub>H<sub>118</sub>F<sub>4</sub>N<sub>6</sub>O<sub>2</sub>S<sub>2</sub> [M]<sup>+</sup>: 1771.0879, found, 1771.0871.

#### ZITI-N-CH<sub>3</sub>:

2,2'-[[[6,6,13,13-tetrakis(2-butyloctyl)-4,11-dimethyl-4,6,11,13-tetrahydropentaleno[2,1-*f*:5,4-*f'*]dithieno[3,2-*b*:3',2'-*b'*]diindole-2,9-diyl]bis[methyldiyne(5,6-difluoro-3-*oxo*-1*H*-indene-2,1(3*H*)-diylidene)]]bis[malononitrile]

#### ZITI-N-C<sub>8</sub>H<sub>17</sub>:

2,2'-[[[6,6,13,13-tetrakis(2-butyloctyl)-4,11-dioctyl-4,6,11,13-tetrahydropentaleno[2,1-*f*:5,4-*f'*]dithieno[3,2-*b*:3',2'-*b'*]diindole-2,9-diyl]bis[methyldiyne(5,6-difluoro-3-*oxo*-1*H*-indene-2,1(3*H*)-diylidene)]]bis[malononitrile]

### ZITI-N-EH:

2,2'-[[[6,6,13,13-tetrakis(2-butyloctyl)-4,11-2-ethylhexyl-4,6,11,13-tetrahydropentaleno[2,1-*f*:5,4-*f'*]]dithieno[3,2-*b*:3',2'-*b'*]]diindole-2,9-diyl]]bis[methyldiyne(5,6-difluoro-3-*oxo*-1*H*-indene-2,1(3*H*)-diylidene)]]bis[malononitrile]

**The preparation of ZnO sol-gel is based on the reference** (*Adv. Mater.*, 2013, **25**, 2397–2402). The detail process is shown below:

Zinc acetate dihydrate [ $\text{Zn}(\text{CH}_3\text{COO})\cdot 2\text{H}_2\text{O}$ ] (Aldrich, 99.9%) with 0.1 M concentration was first dissolved in anhydrous ethanol [ $\text{CH}_3\text{CH}_2\text{OH}$ ] (99.5+% Aldrich) and rigorously stirred for 2–3 h at 80 °C. Subsequently, ethanolamine was added to the solution as sol stabilizer followed by thorough mixing process with magnetic stirrer for 12–15 h at 60 °C.

**The measurement of film thickness.** The step profiler was used to measure the film thickness by scanning profilometry. A thin probe was used to scan the surface of the sample. When a height difference was detected, the changes was converted into voltage signal in the internal circuit and then the film thickness was calculated.

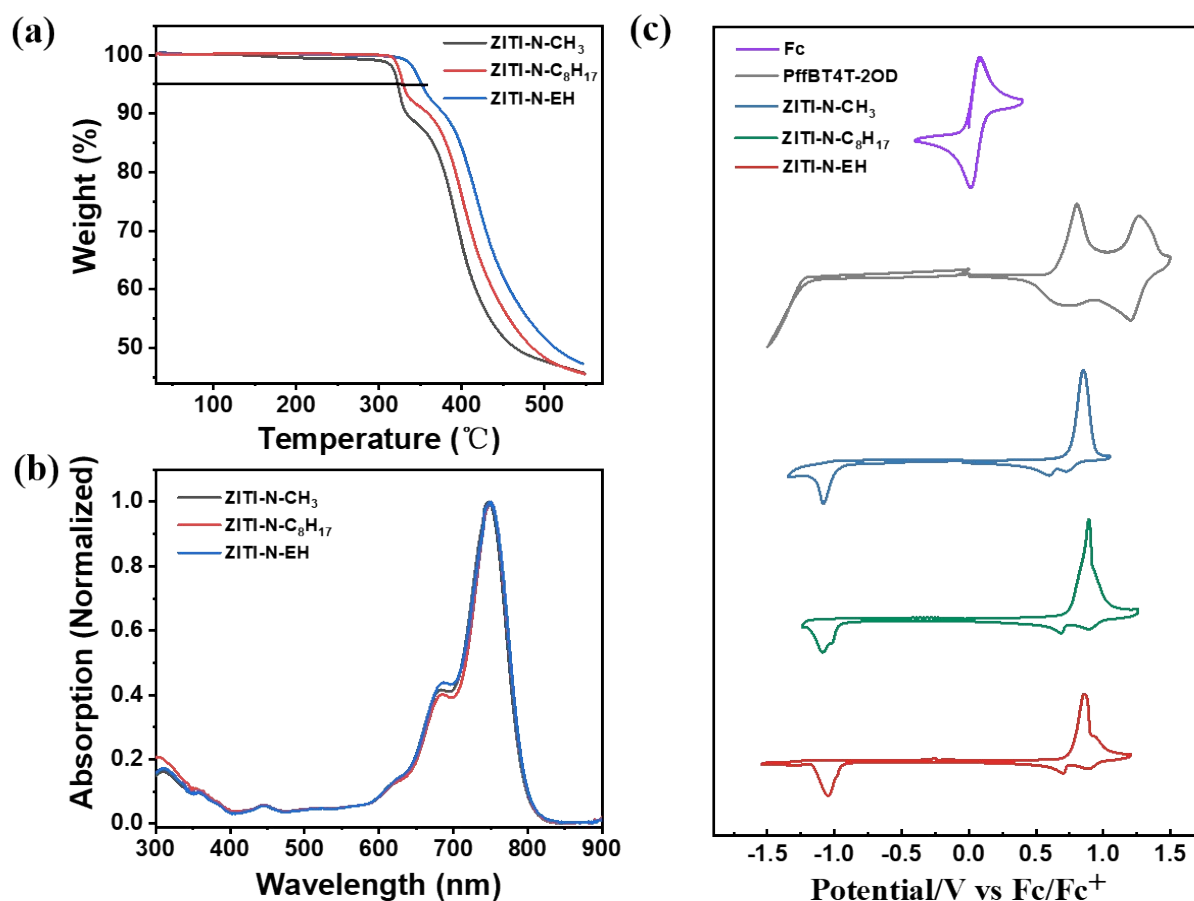

**Fig. S1** (a) Thermal gravimetric analysis (TGA) curve of ZITI-N-CH<sub>3</sub>, ZITI-N-C<sub>8</sub>H<sub>17</sub> and ZITI-N-EH; (b) UV-vis-NIR absorption spectra of ZITI-N-CH<sub>3</sub>, ZITI-N-C<sub>8</sub>H<sub>17</sub> and ZITI-N-EH in chloroform; (c) Cyclic voltammogram of PffBT4T-2OD, ZITI-N-CH<sub>3</sub>, ZITI-N-C<sub>8</sub>H<sub>17</sub> and ZITI-N-EH films in 0.1 mol/L CH<sub>3</sub>CN solution of tetrabutylammonium perchlorate (TBAP) as the supporting electrolyte with a scan rate of 100 mV s<sup>-1</sup>.

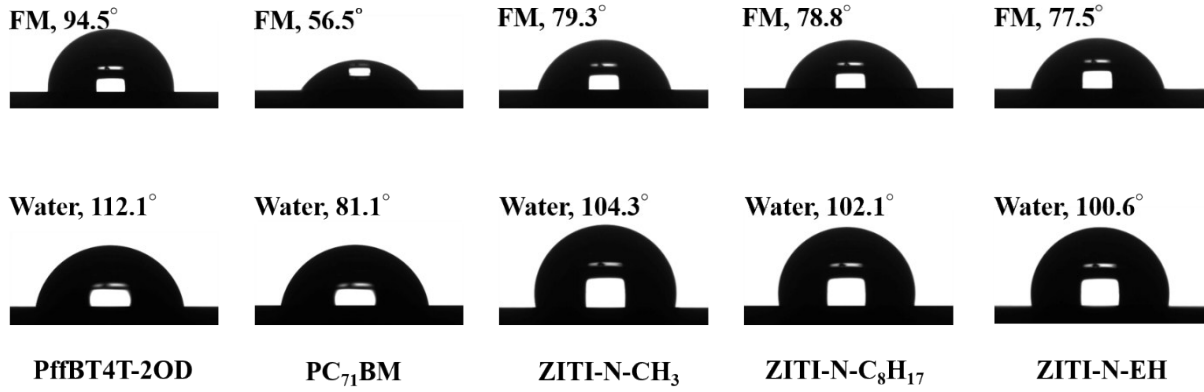

**Fig. S2** Contact angles of formamide (FM) and water droplets on PffBT4T-2OD, PC<sub>71</sub>BM, ZITI-N-CH<sub>3</sub>, ZITI-N-C<sub>8</sub>H<sub>17</sub>, and ZITI-N-EH neat films.

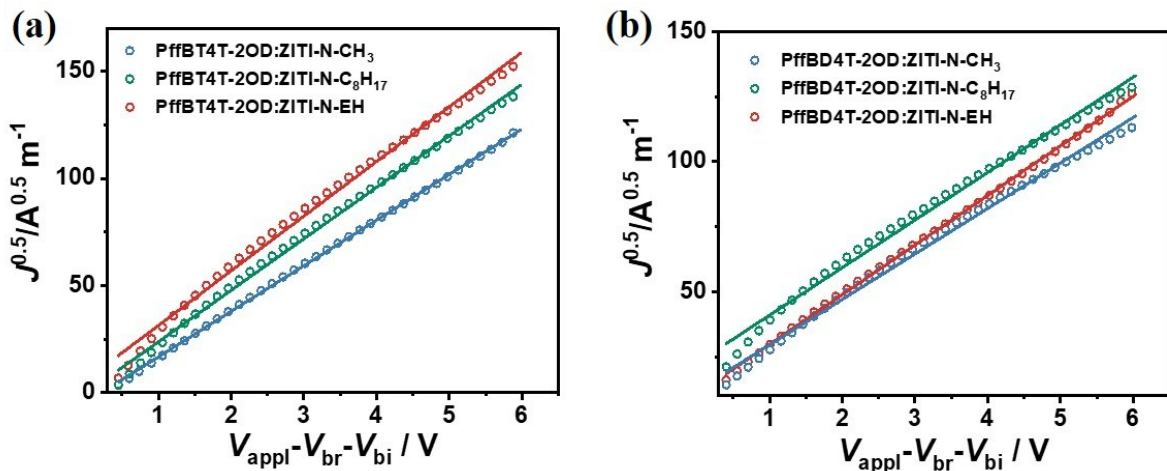

**Fig. S3**  $J^{0.5}$  vs  $V$  characteristics for PffBT4T-2OD:ZITI-N-CH<sub>3</sub>-, PffBT4T-2OD:ZITI-N-C<sub>8</sub>H<sub>17</sub>- and PffBT4T-2OD:ZITI-N-EH-based PSCs; hole-only diode (a) and electron-only diode (b).

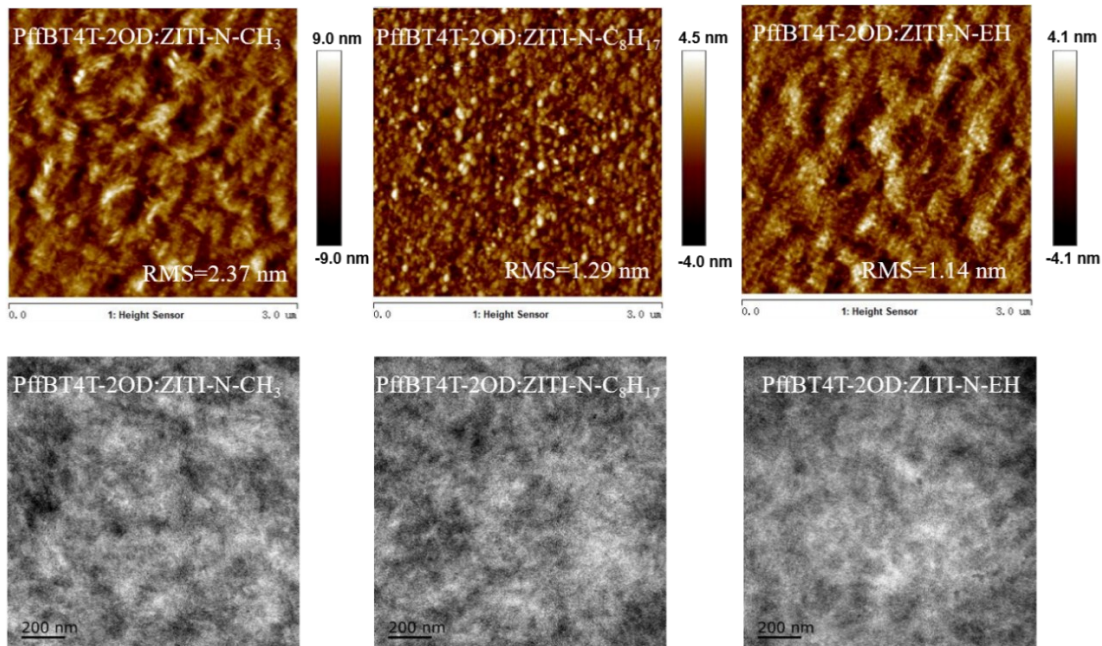

**Fig. S4** AFM height images (up) and TEM (down) images of the PffBT4T-2OD:ZITI-N-CH<sub>3</sub>, PffBT4T-2OD:ZITI-N-C<sub>8</sub>H<sub>17</sub> and PffBT4T-2OD:ZITI-N-EH blend films.

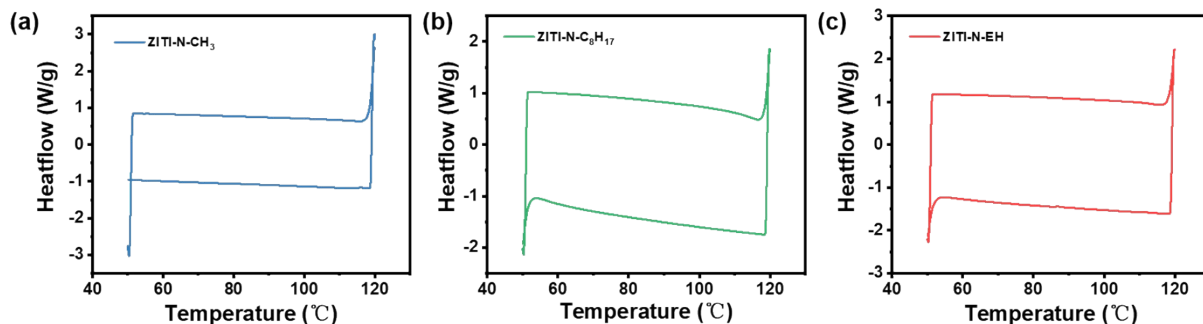

**Fig. S5.** Differential scanning calorimetry (DSC) curves of ZITI-N-CH<sub>3</sub>, ZITI-N-C<sub>8</sub>H<sub>17</sub>, and ZITI-N-EH with a heating rate of 10 °C min<sup>-1</sup> under inert atmosphere.

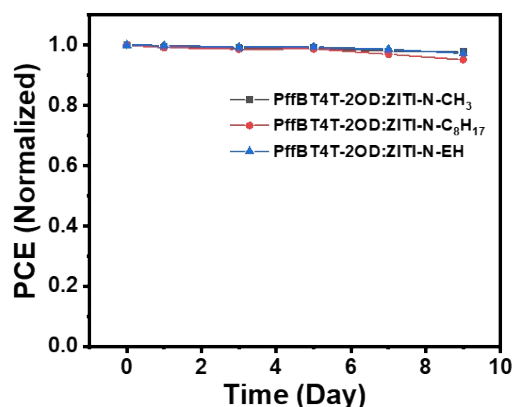

**Fig. S6.** The evolution of the photovoltaic performance over storage time of the optimized device based on the PffBT4T-2OD:ZITI-N-R (R=CH<sub>3</sub>, C<sub>8</sub>H<sub>17</sub>, EH) with encapsulation in glove box.

**Table S1.** The contact angles and surface energy parameters of the materials.

| Organic layer                         | Contact angle water [deg] | Contact angle FM <sup>(a)</sup> [deg] | $\gamma_d^{(b)}$ [mN m <sup>-1</sup> ] | $\gamma_p^{(b)}$ [mN m <sup>-1</sup> ] | $\gamma$ [mN m <sup>-1</sup> ] | $(\sqrt{\gamma_{donor}} - \sqrt{\gamma_{acceptor}})^2$ <sup>(c)</sup> |
|---------------------------------------|---------------------------|---------------------------------------|----------------------------------------|----------------------------------------|--------------------------------|-----------------------------------------------------------------------|
| PffBT4T-2OD                           | 112.1                     | 94.5                                  | 16.19                                  | 2.21                                   | 18.40                          | --                                                                    |
| PC <sub>71</sub> BM                   | 81.1                      | 56.5                                  | 25.77                                  | 10.64                                  | 36.41                          | 3.04                                                                  |
| ZITI-N-CH <sub>3</sub>                | 104.3                     | 79.3                                  | 25.13                                  | 2.12                                   | 27.25                          | 0.87                                                                  |
| ZITI-N-C <sub>8</sub> H <sub>17</sub> | 102.1                     | 78.8                                  | 23.27                                  | 3.34                                   | 26.61                          | 0.76                                                                  |
| ZITI-N-EH                             | 100.6                     | 77.5                                  | 22.21                                  | 4.17                                   | 26.38                          | 0.72                                                                  |

(a) FM is formamide; (b)  $\gamma_d$  and  $\gamma_p$  represent the surface free energies generated from the dispersion forces and the polar forces, respectively; (c) Estimates for all Flory-Huggins interaction parameter ( $\chi_{donor,acceptor}$ ) can in principle be derived using the relation of  $\chi_{donor,acceptor} = K(\sqrt{\gamma_{donor}} - \sqrt{\gamma_{acceptor}})^2$  (K is a constant)<sup>[51]</sup>

**Table S2.** Photovoltaic performance of PffBT4T-2OD:ZITI-N-R-based solar cells with different D/A ratio. Average values with standard deviation were obtained from 6 devices.

|                                    | D:A   | $V_{oc}$ (V) | $J_{sc}$ (mA cm <sup>-2</sup> ) | FF (%) | PCE (%)          |
|------------------------------------|-------|--------------|---------------------------------|--------|------------------|
| PffBT4T-2OD:ZITI-N-CH <sub>3</sub> | 1:0.8 | 0.827        | 17.51                           | 59.48  | 8.61 (8.39±0.24) |
|                                    | 1:1   | 0.824        | 18.97                           | 56.02  | 8.78 (8.52±0.22) |

|                                                            |       |       |       |       |                    |
|------------------------------------------------------------|-------|-------|-------|-------|--------------------|
| <b>PffBT4T-<br/>2OD:ZITI-N-C<sub>8</sub>H<sub>17</sub></b> | 1:1.2 | 0.825 | 19.12 | 52.34 | 8.26 (8.10±0.20)   |
|                                                            | 1:0.8 | 0.801 | 20.76 | 71.19 | 11.83 (11.66±0.19) |
|                                                            | 1:1   | 0.802 | 21.04 | 71.85 | 12.13 (11.92±0.14) |
|                                                            | 1:1.2 | 0.790 | 20.32 | 68.55 | 11.01 (10.78±0.14) |
| <b>PffBT4T-<br/>2OD:ZITI-N-EH</b>                          | 1:0.8 | 0.813 | 20.83 | 73.22 | 12.42 (12.18±0.18) |
|                                                            | 1:1   | 0.805 | 22.13 | 73.35 | 13.07 (12.80±0.15) |
|                                                            | 1:1.2 | 0.801 | 21.67 | 67.63 | 11.70 (11.44±0.21) |

**Table S3.** Photovoltaic performance of PffBT4T-2OD:ZITI-N-R-based solar cells different thermal annealing temperature. Average values with standard deviation were obtained from 6 devices.

|                                                            | <b>Treatment</b> | $V_{oc}$<br>(V) | $J_{sc}$<br>(mA cm <sup>-2</sup> ) | <b>FF</b><br>(%) | <b>PCE</b><br>(%)  |
|------------------------------------------------------------|------------------|-----------------|------------------------------------|------------------|--------------------|
| <b>PffBT4T-<br/>2OD:ZITI-N-CH<sub>3</sub></b>              | as-cast          | 0.837           | 17.60                              | 50.93            | 7.51 (7.36±0.16)   |
|                                                            | 80°C/10 min      | 0.826           | 18.74                              | 52.87            | 8.18 (7.94±0.28)   |
|                                                            | 100°C/10 min     | 0.824           | 18.97                              | 56.02            | 8.78 (8.52±0.22)   |
|                                                            | 120°C/10 min     | 0.818           | 19.29                              | 52.03            | 8.22 (8.01±0.27)   |
| <b>PffBT4T-<br/>2OD:ZITI-N-C<sub>8</sub>H<sub>17</sub></b> | as-cast          | 0.813           | 20.38                              | 66.78            | 11.05 (10.79±0.15) |
|                                                            | 80°C/10 min      | 0.812           | 20.76                              | 71.19            | 11.98 (11.80±0.12) |
|                                                            | 100°C/10 min     | 0.802           | 21.04                              | 71.85            | 12.13 (11.92±0.14) |
|                                                            | 120°C/10 min     | 0.801           | 20.39                              | 72.81            | 11.89 (11.73±0.19) |
| <b>PffBT4T-<br/>2OD:ZITI-N-EH</b>                          | as-cast          | 0.817           | 20.77                              | 70.32            | 11.94 (11.76±0.15) |
|                                                            | 60°C/10 min      | 0.812           | 21.28                              | 69.80            | 12.56 (12.48±0.19) |
|                                                            | 80°C/10 min      | 0.805           | 22.13                              | 73.35            | 13.07 (12.80±0.15) |
|                                                            | 100°C/10 min     | 0.795           | 21.69                              | 69.50            | 12.01 (11.77±0.26) |

**Table S4.** Photovoltaic performance of PffBT4T-2OD:ZITI-N-R-based solar cells with different thicknesses. Average values with standard deviation were obtained from 6 devices.

|                                                            | <b>rpm</b> | <b>Thickness</b><br>(nm) | $V_{oc}$<br>(V) | $J_{sc}$<br>(mA cm <sup>-2</sup> ) | <b>FF</b><br>(%) | <b>PCE</b><br>(%)  |
|------------------------------------------------------------|------------|--------------------------|-----------------|------------------------------------|------------------|--------------------|
| <b>PffBT4T-<br/>2OD:ZITI-N-CH<sub>3</sub></b>              | 3500r      | 110 nm                   | 0.824           | 18.78                              | 55.04            | 8.52 (8.27±0.19)   |
|                                                            | 3000r      | 130 nm                   | 0.824           | 18.97                              | 56.02            | 8.78 (8.52±0.22)   |
|                                                            | 2500r      | 170 nm                   | 0.820           | 19.53                              | 47.71            | 7.64 (7.41±0.13)   |
|                                                            | 2000r      | 200 nm                   | 0.819           | 19.35                              | 45.21            | 7.16 (7.05±0.18)   |
| <b>PffBT4T-<br/>2OD:ZITI-N-C<sub>8</sub>H<sub>17</sub></b> | 3500r      | 110 nm                   | 0.801           | 20.39                              | 72.81            | 11.89 (11.76±0.16) |
|                                                            | 3000r      | 130 nm                   | 0.802           | 21.04                              | 71.85            | 12.13 (11.92±0.14) |
|                                                            | 2500r      | 170 nm                   | 0.798           | 21.01                              | 68.82            | 11.51 (11.34±0.14) |
|                                                            | 2000r      | 200 nm                   | 0.797           | 20.98                              | 66.12            | 11.04 (10.74±0.24) |
| <b>PffBT4T-<br/>2OD:ZITI-N-EH</b>                          | 3500r      | 110 nm                   | 0.806           | 21.74                              | 71.93            | 12.62 (12.47±0.24) |
|                                                            | 3000r      | 130 nm                   | 0.805           | 22.13                              | 73.35            | 13.07 (12.80±0.15) |
|                                                            | 2500r      | 170 nm                   | 0.804           | 22.12                              | 70.30            | 12.57 (12.43±0.10) |
|                                                            | 2000r      | 200 nm                   | 0.804           | 22.45                              | 67.79            | 12.35 (12.14±0.13) |

**Table S5.** The photovoltaic parameters of TDA polymer-based PSCs.

| Active layer                                               | Processing temperature (°C) | Thickness (nm) | $V_{oc}$ (V) | $J_{sc}$ (mA/cm <sup>2</sup> ) | FF (%) | PCE (%) | Ref.      |
|------------------------------------------------------------|-----------------------------|----------------|--------------|--------------------------------|--------|---------|-----------|
| PNTDT-2F2T:PC <sub>71</sub> BM                             | 40                          | 210            | 0.73         | 18.80                          | 70.0   | 9.63    | 1         |
| NT812:PC <sub>71</sub> BM                                  | 70                          | 300            | 0.72         | 20.61                          | 66.99  | 10.2    | 2         |
| PffBT <sub>2</sub> -DPPT <sub>2</sub> :PC <sub>71</sub> BM | 100                         | 100            | 0.81         | 17.26                          | 60     | 8.44    | 3         |
| PTBTz-2:PC <sub>71</sub> BM                                | 100                         | 100            | 0.83         | 16.84                          | 69.5   | 9.72    | 4         |
| PffBT4T-2OD:PC <sub>71</sub> BM                            | 110                         | 240            | 0.76         | 17.8                           | 61     | 8.3     | 5         |
| PffBT4T-2OD:PC <sub>71</sub> BM                            | 100                         | 300            | 0.79         | 18.5                           | 71     | 10.3    | 5         |
| PffBT4T-2OD:PC <sub>71</sub> BM                            | 80                          | 350            | 0.76         | 17.3                           | 60     | 7.9     | 5         |
| PffBX4T-2DT:PC <sub>71</sub> BM                            | 110                         | 250            | 0.875        | 15.8                           | 66     | 9.4     | 6         |
| PffBX4T-2DT:PC <sub>71</sub> BM                            | 110                         | 110            | 0.878        | 13.6                           | 72     | 8.9     | 6         |
| PffBX4T-2DT:PC <sub>71</sub> BM                            | 110                         | 300            | 0.867        | 15.9                           | 62     | 8.7     | 6         |
| PffBT-T3(1,2)-2:PC <sub>71</sub> BM                        | 110                         | 250            | 0.82         | 18.7                           | 68.3   | 10.5    | 7         |
| P3:PC <sub>71</sub> BM                                     | 110                         | 210            | 0.66         | 20.69                          | 71     | 9.76    | 8         |
| P2:PC <sub>71</sub> BM                                     | 110                         | 136            | 0.69         | 16.3                           | 69     | 7.76    | 9         |
| PffBT4T-2OD:PC <sub>71</sub> BM                            | 110                         | 300            | 0.77         | 18.4                           | 74     | 10.5    | 10        |
| PBDTTT-H:PC <sub>71</sub> BM                               | 110                         | 95             | 0.8          | 17.37                          | 67.5   | 9.38    | 11        |
| PNTz4TF2:PC <sub>71</sub> BM                               | 160                         | 230            | 0.82         | 19.3                           | 0.67   | 10.5    | 11        |
| PffT2-FTAZ:PC <sub>71</sub> BM                             | 115                         | 250            | 0.8          | 13.3                           | 69     | 7.5     | 12        |
| FBT-Th4(1,4):PC <sub>71</sub> BM                           | 60                          | 230            | 0.76         | 16.2                           | 62.1   | 7.64    | 13        |
| PffBT-2TPF4-19/1:PC <sub>61</sub> BM                       | 30                          | 169            | 0.754        | 17.05                          | 69.3   | 8.9     | 14        |
| PffBT-2TPF4-9/1:PC <sub>61</sub> BM                        | 30                          | 168            | 0.769        | 17.18                          | 70.8   | 9.4     | 14        |
| PffBT-2TPF4-4/1:PC <sub>61</sub> BM                        | 30                          | 148            | 0.772        | 16.55                          | 72.7   | 9.3     | 14        |
| PffBT4T90-co-3T10:PC <sub>71</sub> BM                      | 25                          | 400            | 0.73         | 19.9                           | 65.0   | 9.6     | 15        |
| PffBT4T-2OD:BTR:PC <sub>71</sub> BM                        | 25                          | 300            | 0.77         | 18.28                          | 74.02  | 10.59   | 16        |
| PNTT:BTR:PC <sub>71</sub> BM                               | 25                          | 300            | 0.77         | 20.83                          | 70.43  | 11.44   | 16        |
| PffBX-TT:PC <sub>71</sub> BM                               | 130                         | 250            | 0.85         | 15.3                           | 66.2   | 9.10    | 17        |
| PffBX-DTT:PC <sub>71</sub> BM                              | 25                          | 260            | 0.82         | 12.8                           | 62.2   | 6.66    | 17        |
| PFBT4T-C5Si-25%:PC <sub>71</sub> BM                        | 90                          | 420            | 0.76         | 19.08                          | 74.12  | 11.09   | 18        |
| PTFB-O:ITIC-Th                                             | 110                         | 96             | 0.92         | 16.70                          | 67.6   | 10.9    | 19        |
| PffBT4T-2DT:EH-IDTBR                                       | 60                          | 80             | 1.02         | 17.2                           | 0.63   | 11.1    | 20        |
| PffBT4T-2OD:BAF-4CN                                        | 70                          | 290            | 0.769        | 15.52                          | 70.7   | 8.4     | 21        |
| PffT2-FTAZ-2DT:IEIC                                        | 80                          | 80             | 0.998        | 12.2                           | 59     | 7.2     | 22        |
| P3TEA:SF-PDI <sub>2</sub>                                  | 90                          | 120            | 1.11         | 13.27                          | 64.3   | 9.5     | 23        |
| PTP8:P(NDI2HD-Se)                                          | 135                         | 133            | 0.99         | 9.7                            | 62.6   | 6.01    | 24        |
| PffBT4T-2OD:EH-IDTBR                                       | 110                         | 300            | 1.03         | 16.1                           | 54.5   | 9.1     | 25        |
| PffBT4T-2OD:ZITI-N-EH                                      | 25                          | 130            | 0.805        | 22.13                          | 73.35  | 13.07   | This work |

## References

1. W. S. Yoon, D. W. Kim, M.-W. Choi, J.-M. Park, S. Y. Park, *Adv. Energy Mater.*, 2018, **8**, 1701467.
2. Y. Jin, Z. Chen, S. Dong, N. Zheng, L. Ying, X. F. Jiang, F. Liu, F. Huang, Y. Cao, *Adv. Mater.*, 2016, **28**, 9811.
3. T. Ma, K. Jiang, S. Chen, H. Hu, H. Lin, Z. Li, J. Zhao, Y. Liu, Y.-M. Chang, C.-C. Hsiao, H. Yan, *Adv. Energy Mater.*, 2015, **5**, 1501282.
4. D. Zhu, X. Bao, Q. Zhu, C. Gu, M. Qiu, S. Wen, J. Wang, B. Shahid, R. Yang, *Energy Environ. Sci.*, 2017, **10**, 614.
5. W. Ma, G. Yang, K. Jiang, J. H. Carpenter, Y. Wu, X. Meng, T. McAfee, J. Zhao, C. Zhu, C. Wang, H. Ade, H. Yan, *Adv. Energy Mater.*, 2015, **5**, 1501400.
6. J. Zhao, Y. Li, A. Hunt, J. Zhang, H. Yao, Z. Li, J. Zhang, F. Huang, H. Ade, H. Yan, *Adv. Mater.*, 2016, **28**, 1868.
7. H. Hu, K. Jiang, G. Yang, J. Liu, Z. Li, H. Lin, Y. Liu, J. Zhao, J. Zhang, F. Huang, Y. Qu, W. Ma, H. Yan, *J. Am. Chem. Soc.*, 2015, **137**, 14149.
8. S. Shi, Q. Liao, Y. Tang, H. Guo, X. Zhou, Y. Wang, T. Yang, Y. Liang, X. Cheng, F. Liu, X. Guo, *Adv. Mater.*, 2016, **28**, 9969.
9. Z. Zhang, Z. Lu, J. Zhang, Y. Liu, S. Feng, L. Wu, R. Hou, X. Xu, Z. Bo, *Org. Electronics.*, 2017, **40**, 36.
10. Y. Liu, J. Zhao, Z. Li, C. Mu, W. Ma, H. Hu, K. Jiang, H. Lin, H. Ade, H. Yan, *Nat. Commun.*, 2014, **5**, 5293.
11. K. Kawashima, T. Fukuhara, Y. Suda, Y. Suzuki, T. Koganezawa, H. Yoshida, H. Ohkita, I. Osaka, K. Takimiya, *J. Am. Chem. Soc.*, 2016, **138**, 10265.
12. Z. Li, H. Lin, K. Jiang, J. Carpenter, Y. Li, Y. Liu, H. Hu, J. Zhao, W. Ma, H. Ade, H. Yan, *Nano Energy*, 2015, **15**, 607.
13. Z. Chen, P. Cai, J. Chen, X. Liu, L. Zhang, L. Lan, J. Peng, Y. Ma, Y. Cao, *Adv. Mater.*, 2014, **26**, 2586.
14. X. Liao, L. Zhang, L. Chen, X. Hu, Q. Ai, W. Ma, Y. Chen, *Nano Energy*, 2017, **37**, 32.
15. B. Xu, I. Pelse, S. Agarkar, S. Ito, J. Zhang, X. Yi, Y. Chujo, S. Marder, F. So, J. R. Reynolds, *ACS Appl. Mater. Interfaces*, 2018, **10**, 44583.
16. M. Xiao, K. Zhang, Y. Jin, Q. Yin, W. Zhong, F. Huang, Y. Cao, *Nano Energy*, 2018, **48**, 53.
17. P. Chen, S. Shi, H. Wang, F. Qiu, Y. Wang, Y. Tang, J. R. Feng, H. Guo, X. Cheng, X. Guo, *ACS Appl. Mater. Interfaces*, 2018, **10**, 21481.
18. X. Liu, L. Nian, K. Gao, L. Zhang, L. Qing, Z. Wang, L. Ying, Z. Xie, Y. Ma, Y. Cao, F. Liu, J. Chen, *J. Mater. Chem. A.*, 2017, **5**, 17619.
19. H. Hu, K. Jiang, P. C. Y. Chow, L. Ye, G. Zhang, Z. Li, J. H. Carpenter, H. Ade, H. Yan, *Adv. Energy Mater.*, 2018, **8**, 1701674.

20. A. Wadsworth, R. S. Ashraf, M. Abdelsamie, S. Pont, M. Little, M. Moser, Z. Hamid, M. Neophytou, W. Zhang, A. Amassian, J. R. Durrant, D. Baran, I. McCulloch, *ACS Energy Letters.*, 2017, **2**, 1494.
21. Suman, V. Gupta, A. Bagui, S. P. Singh, *Adv. Funct. Mater.*, 2017, **27**, 1603820.
22. H. Lin, S. Chen, Z. Li, J. Lai, G. Yang, T. McAfee, K. Jiang, Y. Li, Y. Liu, H. Hu, J. Zhao, W. Ma, H. Ade, H. Yan, *Adv. Mater.*, 2015, **27**, 7299.
23. J. Liu, S. Chen, D. Qian, B. Gautam, G. Yang, J. Zhao, J. Bergqvist, F. Zhang, W. Ma, H. Ade, O. Inganas, K. Gundogdu, F. Gao, H. Yan, *Nat. Energy*, 2016, **1**, 16089.
24. S. Shi, J. Yuan, G. Ding, M. Ford, K. Lu, G. Shi, J. Sun, X. Ling, Y. Li, W. Ma, *Adv. Funct. Mater.*, 2016, **26**, 5669.
25. G. Zhang, R. Xia, Z. Chen, J. Xiao, X. Zhao, S. Liu, H. Yip, Y. Cao, *Adv. Energy Mater.*, 2018, **8**, 1801609.



**<sup>1</sup>H NMR**  
ZITI-N-C<sub>8</sub>H<sub>17</sub>

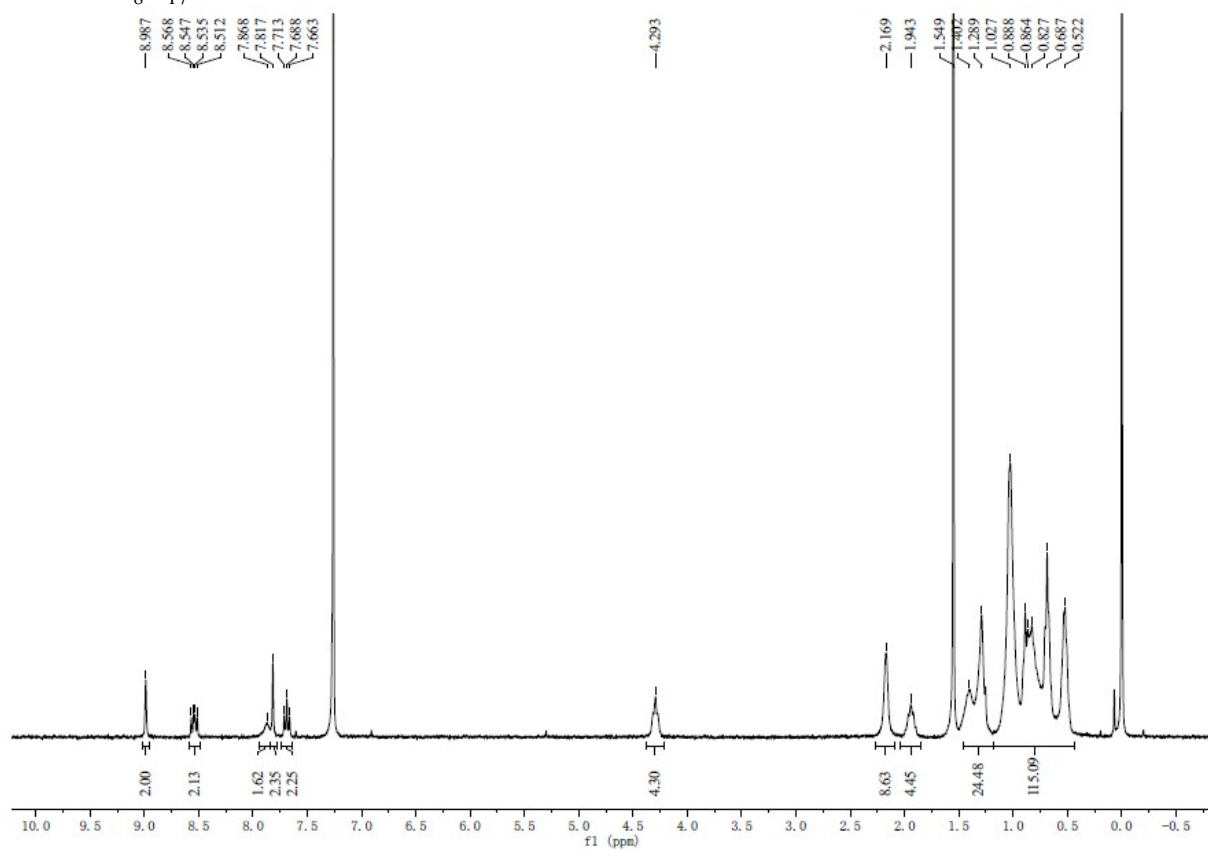

**ZITI-N-EH**

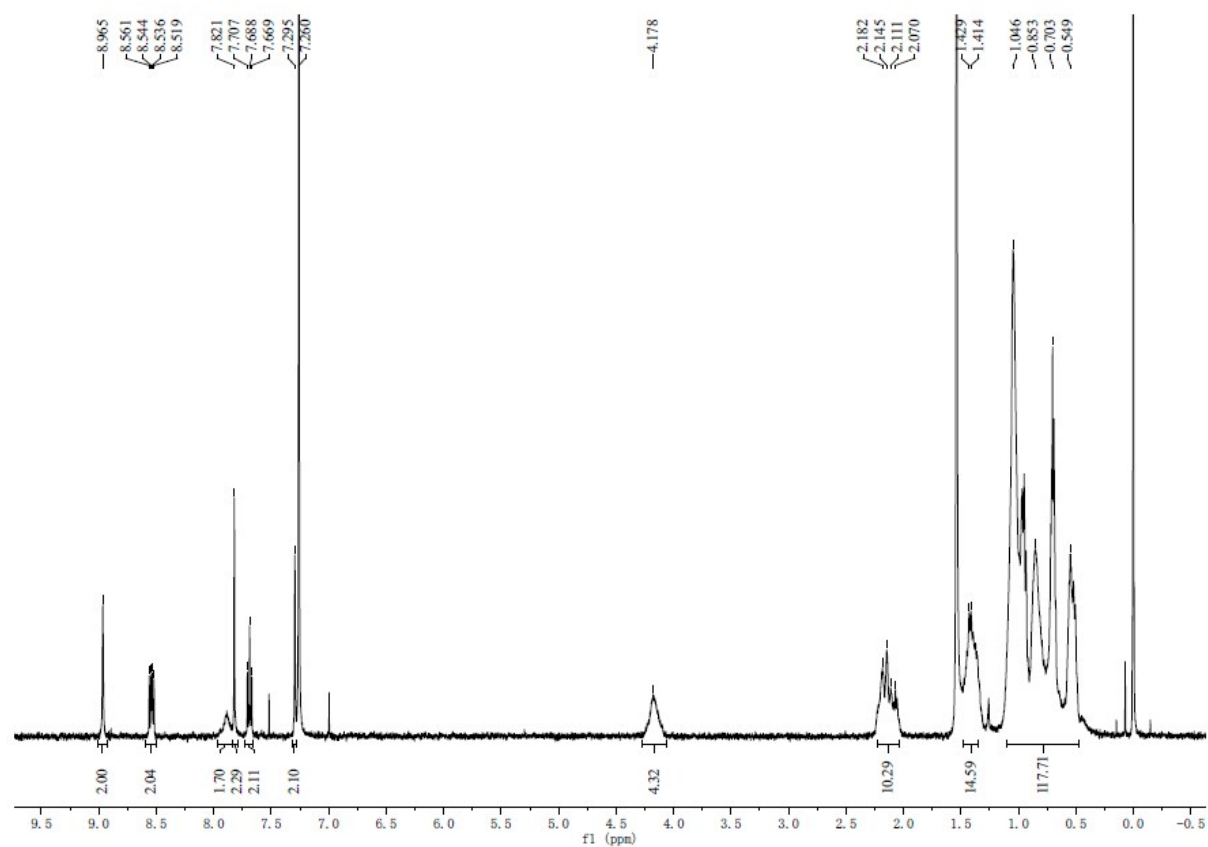

# High Resolution MALDI-TOF Mass Spectrum of Compound ZITI-N-C<sub>8</sub>H<sub>17</sub>

## MALDI,ZJY-2

**Analysis Info**  
 Analysis Name D:\Data\MALDI\2019\0813\ZJY-2\_0\_P8\_000003.d Acquisition Date 8/13/2019 2:52:18 PM  
 Method MALDI\_P\_100-3000 Operator  
 Sample Name MURU-N-ESI Instrument solarix  
 Comment

**Acquisition Parameter**  
 Acquisition Mode Single MS Acquired Scans 4 Calibration Date Tue Aug 13 02:40:33  
 Polarity Positive No. of Cell Fills 1 Data Acquisition Size 2099152  
 Broadband Low Mass 202.1 m/z No. of Laser Shots 10 Data Processing Size 4194304  
 Broadband High Mass 2600.0 m/z Laser Power 10.2 lp Apodization Sine-Bell Multiplication  
 Source Accumulation 0.001 sec Laser Shot Frequency 0.020 sec Ion Accumulation Time 0.300 sec

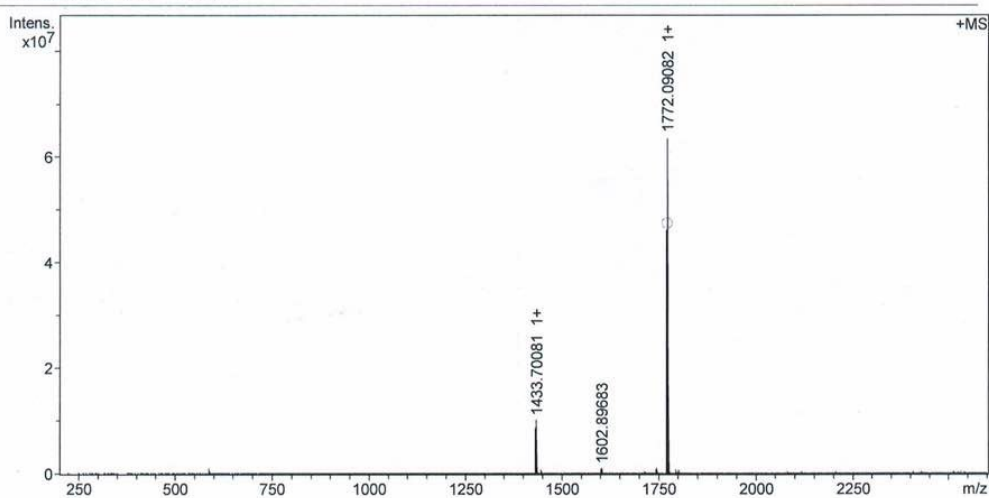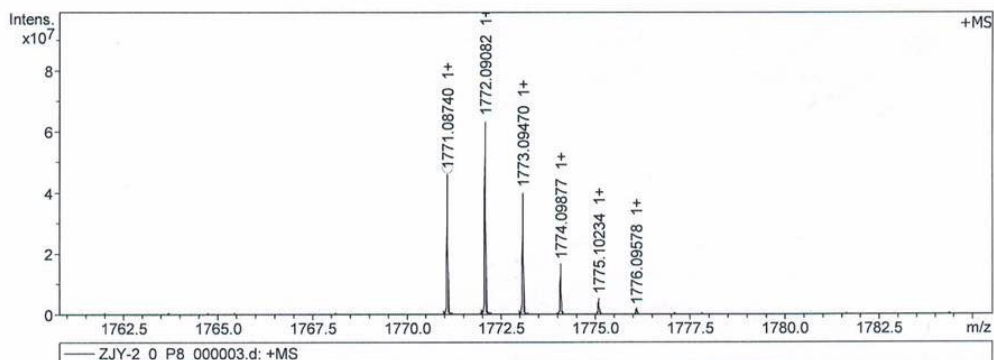

| Meas. m/z   | # | Ion Formula                                                                                   | Score  | m/z         | err [ppm] | Mean err [ppm] | mSigma | rdb  | e <sup>-</sup> Conf | N-Rule |
|-------------|---|-----------------------------------------------------------------------------------------------|--------|-------------|-----------|----------------|--------|------|---------------------|--------|
| 1771.087400 | 1 | C <sub>114</sub> H <sub>146</sub> F <sub>4</sub> N <sub>6</sub> O <sub>2</sub> S <sub>2</sub> | 100.00 | 1771.087934 | 0.3       | -0.3           | 57.4   | 43.0 | odd                 | ok     |

# High Resolution MALDI-TOF Mass Spectrum of Compound ZITI-N-EH

ZITI-N(EH)-47

## MALDI,3

### Analysis Info

Analysis Name D:\Data\MALDI\2019\0725\3\_0\_K3\_000001.d  
 Method MALDI\_P\_100-3000  
 Sample Name MURU-N-ESI  
 Comment

Acquisition Date 7/25/2019 3:00:49 PM

Operator  
 Instrument solarix

### Acquisition Parameter

|                       |            |                      |           |                       |                          |
|-----------------------|------------|----------------------|-----------|-----------------------|--------------------------|
| Acquisition Mode      | Single MS  | Acquired Scans       | 2         | Calibration Date      | Thu Jul 25 02:57:15 2019 |
| Polarity              | Positive   | No. of Cell Fills    | 1         | Data Acquisition Size | 2097152                  |
| Broadband Low Mass    | 202.1 m/z  | No. of Laser Shots   | 10        | Data Processing Size  | 4194304                  |
| Broadband High Mass   | 2600.0 m/z | Laser Power          | 10.6 lp   | Apodization           | Sine-Bell Multiplication |
| Source Accumulation   | 0.001 sec  | Laser Shot Frequency | 0.020 sec |                       |                          |
| Ion Accumulation Time | 0.300 sec  |                      |           |                       |                          |

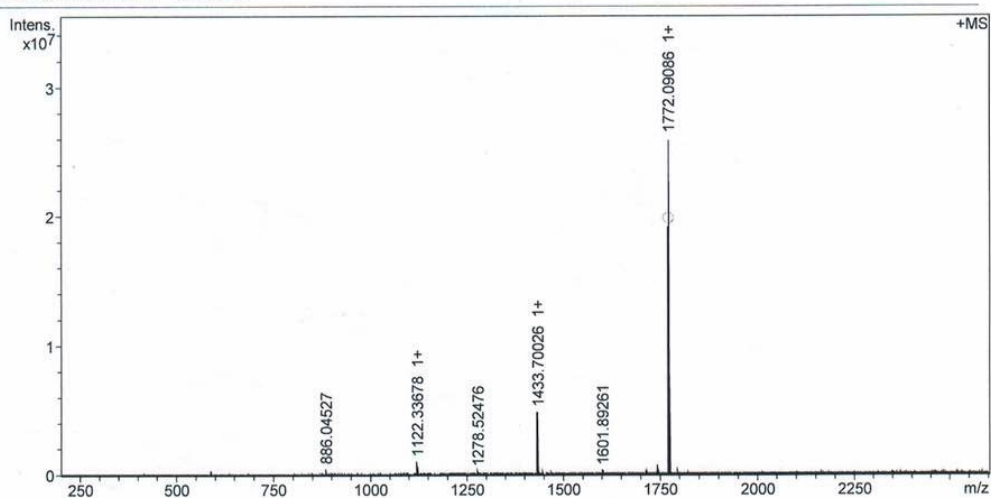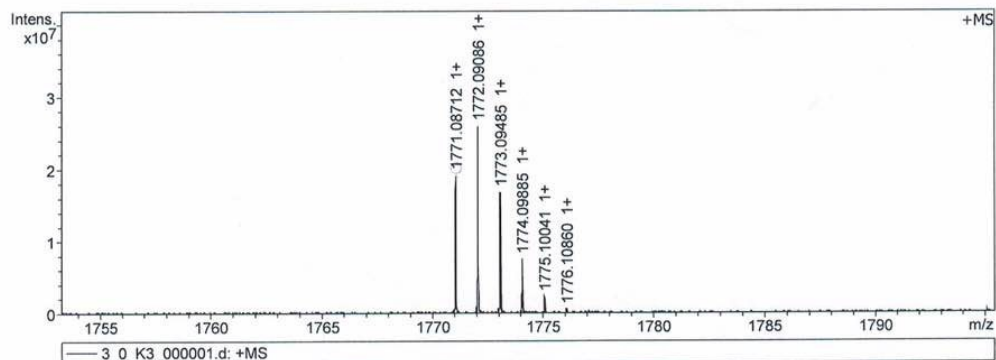

| Meas. m/z   | # | Ion Formula                                                                                   | Score  | m/z         | err [ppm] | Mean err [ppm] | mSigma | rdb  | e <sup>-</sup> Conf | N-Rule |
|-------------|---|-----------------------------------------------------------------------------------------------|--------|-------------|-----------|----------------|--------|------|---------------------|--------|
| 1771.087116 | 1 | C <sub>114</sub> H <sub>146</sub> F <sub>4</sub> N <sub>6</sub> O <sub>2</sub> S <sub>2</sub> | 100.00 | 1771.087934 | -0.5      | -0.4           | 42.7   | 43.0 | odd                 | ok     |
